# Supplementary material for: Assessment of Food and Waterborne Viral Outbreaks by Using Field Epidemiologic, Modern Laboratory and Statistical Methods—Lessons Learnt from Seven Major Norovirus Outbreaks in Finland
Source: Pathogens. 2021 Dec 14;10(12):1624. doi: 10.3390/pathogens10121624 (PMC8707936; doi:10.3390/pathogens10121624)
Supplement: Supplementary file 1 [file pathogens-10-01624-s001.zip]

Archive with 4 entries (4 files):
- Supplementary file 1.pdf
- Supplementary file 2.xls
- Supplementary file 3.pdf
- Supplementary file 4.txt
