# Supplementary material for: Assessment of Food and Waterborne Viral Outbreaks by Using Field Epidemiologic, Modern Laboratory and Statistical Methods—Lessons Learnt from Seven Major Norovirus Outbreaks in Finland
Source: Pathogens. 2021 Dec 14;10(12):1624. doi: 10.3390/pathogens10121624 (PMC8707936; doi:10.3390/pathogens10121624)
Supplement: Supplementary file 1 [file pathogens-10-01624-s001.zip › Supplementary file 2.xls]

## Sheet: survey
type	name	label	hint	read_only	appearance	required	constraint_message	constraint	relevant	calculation
note	intro	Introduction	This is an interview questionnaire regarding the outbreak in Institute XXX in month, year . Troubleshooting mobile +1234567890 email firstnamelastname@institute.org	yes
note	guidelines	Guidelines	Please only those attending the lunch in the Institute XXX dining hall between dd.-dd3.mm.yyyy are kindly asked to fill in the questionnaire.	yes
begin_group	personal_details	Personal details	Please give the following personal details		table-list
select_one status	status	Status	Are you student, teacher, kitchen staff or other staff?
integer	student_number	Student or staff number	Please enter your student number, staff are given numbers by the study co ordinator			true	Your response needs to be between 1 and 1999 (numbers)	(. >0) and (. <2000)
integer	class	Class	What is your class number? Values between 1 to 10			true	Your response needs to be between 1 and 10 (numbers)	(. >0) and (. <11)	selected(${status},'status_student') or selected(${status},'status_teacher')
integer	age	Age	How old are you (in years)?			true	Your response needs to be between 7 and 69 years (numbers)	(. >6) and (. <70)
end_group	status
begin_group	lunch	Lunch attendance	Did you attend the lunch at any of the following dates (you may choose several)		table-list
select_one lunch_ddmm1	lunch_ddmm1	Lunch attendance on dd1.mm.yyyy				true	Sorry, this response is required.
select_one lunch_ddmm2	lunch_ddmm2	Lunch attendance on dd2.mm.yyyy				true	Sorry, this response is required.
select_one lunch_ddmm3	lunch_ddmm3	Lunch attendance on dd3.mm.yyyy				true	Sorry, this response is required.
end_group	lunch
begin_group	symptoms	Symptoms	Did you have any of the following symptoms?		table-list
select_one diarrhoea	diarrhoea	Diarrhoea?				true	Sorry, this response is required.		selected(${lunch_ddmm1},'lunch_ddmm1_yes') or selected(${lunch_ddmm2},'lunch_ddmm2_yes') or selected(${lunch_ddmm3},'lunch_ddmm3_yes')
select_one abdominalpain	abdominalpain	Abdominal pain?				true	Sorry, this response is required.		selected(${lunch_ddmm1},'lunch_ddmm1_yes') or selected(${lunch_ddmm2},'lunch_ddmm2_yes') or selected(${lunch_ddmm3},'lunch_ddmm3_yes')
select_one fever	fever	Fever?				true	Sorry, this response is required.		selected(${lunch_ddmm1},'lunch_ddmm1_yes') or selected(${lunch_ddmm2},'lunch_ddmm2_yes') or selected(${lunch_ddmm3},'lunch_ddmm3_yes')
select_one vomiting	vomiting	Vomiting?				true	Sorry, this response is required.		selected(${lunch_ddmm1},'lunch_ddmm1_yes') or selected(${lunch_ddmm2},'lunch_ddmm2_yes') or selected(${lunch_ddmm3},'lunch_ddmm3_yes')
select_one nausea	nausea	Nausea?				true	Sorry, this response is required.		selected(${lunch_ddmm1},'lunch_ddmm1_yes') or selected(${lunch_ddmm2},'lunch_ddmm2_yes') or selected(${lunch_ddmm3},'lunch_ddmm3_yes')
select_one headache	headache	Head ache?				true	Sorry, this response is required.		selected(${lunch_ddmm1},'lunch_ddmm1_yes') or selected(${lunch_ddmm2},'lunch_ddmm2_yes') or selected(${lunch_ddmm3},'lunch_ddmm3_yes')
select_one bloodydiar	bloodydiar	Bloody diarrhea?				true	Sorry, this response is required.		selected(${lunch_ddmm1},'lunch_ddmm1_yes') or selected(${lunch_ddmm2},'lunch_ddmm2_yes') or selected(${lunch_ddmm3},'lunch_ddmm3_yes')
end_group	symptoms
begin_group	GP_visit	Visit to your GP			table-list
select_one symptomsstill	symptomsstill	Symptoms	Do you still have symptoms?			true	Sorry, this response is required.		selected(${diarrhoea},'diarrhoea_yes') or selected(${abdominalpain},'abdominalpain_yes') or selected(${fever},'fever_yes') or selected(${vomiting},'vomiting_yes') or selected(${nausea},'nausea_yes') or selected(${headache},'headache_yes')
select_one absentschool	absentschool	School absence	Were you absent from school due to your illness?			true	Sorry, this response is required.		selected(${diarrhoea},'diarrhoea_yes') or selected(${abdominalpain},'abdominalpain_yes') or selected(${fever},'fever_yes') or selected(${vomiting},'vomiting_yes') or selected(${nausea},'nausea_yes') or selected(${headache},'headache_yes')
integer	absentdays	Days of absence	How many days were you absent from school?			true	Sorry, this response is required.	(. >0) and (. <15)	selected(${absentschool},'absentschool_yes')
select_one gp	gp	GP visit	Did you see your GP due to your illness?			true	Sorry, this response is required.		selected(${diarrhoea},'diarrhoea_yes') or selected(${abdominalpain},'abdominalpain_yes') or selected(${fever},'fever_yes') or selected(${vomiting},'vomiting_yes') or selected(${nausea},'nausea_yes') or selected(${headache},'headache_yes')
select_one hospital	hospital	Hospital admission	Were you admitted to a hospital due to your illness?			true	Sorry, this response is required.		selected(${diarrhoea},'diarrhoea_yes') or selected(${abdominalpain},'abdominalpain_yes') or selected(${fever},'fever_yes') or selected(${vomiting},'vomiting_yes') or selected(${nausea},'nausea_yes') or selected(${headache},'headache_yes')
select_one sample	sample	Faecal sample	Did you give a faecal sample?			true	Sorry, this response is required.		selected(${gp},'gp_yes') or selected(${hospital},'hospital_yes')
end_group	GP_visit
begin_group	travel_household	Travel and illness in the household			table-list
select_one travel	travel	Travel	Did you travel abroad during week-before-illness?			true	Sorry, this response is required.		selected(${lunch_ddmm1},'lunch_ddmm1_yes') or selected(${lunch_ddmm2},'lunch_ddmm2_yes') or selected(${lunch_ddmm3},'lunch_ddmm3_yes')
select_one household	household	Household illness	Did anyone in your household have gastrointestinal illness during week-before-your-illness?			true	Sorry, this response is required.		selected(${lunch_ddmm1},'lunch_ddmm1_yes') or selected(${lunch_ddmm2},'lunch_ddmm2_yes') or selected(${lunch_ddmm3},'lunch_ddmm3_yes')
end_group	travel_household
begin_group	food	Food eaten in the School Dining Hall			table-list
select_one food1	food1	Food1	Did you eat Food1 in the School Dining Hall on dd1 or dd2 or dd3 mm.yyyy?			true	Sorry, this response is required.		selected(${travel},'travel_no') and selected(${household},'household_no')
select_one food1_q	food1_q	Food1 quantity	How much did you eat Food1?			true	Sorry, this response is required.		selected(${food1},'food1_yes')
select_one food2	food2	Food2	Did you eat Food2 in the School Dining Hall on dd1 or dd2 or dd3 mm.yyyy?			true	Sorry, this response is required.		selected(${travel},'travel_no') and selected(${household},'household_no')
select_one food2_q	food2_q	Food2 quantity	How much did you eat Food2?			true	Sorry, this response is required.		selected(${food2},'food2_yes')
select_one food3	food3	Food3	Did you eat Food3 in the School Dining Hall on dd1 or dd2 or dd3 mm.yyyy?			true	Sorry, this response is required.		selected(${travel},'travel_no') and selected(${household},'household_no')
select_one food3_q	food3_q	Food3 quantity	How much did you eat Food3?			true	Sorry, this response is required.		selected(${food3},'food3_yes')
end_group	food
begin_group	drinks	Drinks consumed in the School Dining Hall			table-list
select_one drink1	drink1	Drink1	Did you drink Drink1 in the School Dining Hall on dd1 or dd2 or dd3 mm.yyyy?			true	Sorry, this response is required.		selected(${travel},'travel_no') and selected(${household},'household_no')
rank drink1_q	drink1_q	Drink1 quantity	How much did you drink Drink1?			true	Sorry, this response is required.		selected(${drink1},'drink1_yes')
end_group	drinks
begin_group	desserts	Desserts eaten in the School Dining Hall			table-list
select_one dessert1	dessert1	Dessert1	Did you eat Dessert1 in the School Dining Hall on dd1 or dd2 or dd3 mm.yyyy?			true	Sorry, this response is required.		selected(${travel},'travel_no') and selected(${household},'household_no')
select_one dessert1_q	dessert1_q	Dessert1 quantity	How much did you eat Dessert1?			true	Sorry, this response is required.		selected(${dessert1},'dessert1_yes')
end_group	desserts
text	details	Details	Anything you wish to report
note	Finish	To record	This data collection is being supported by the School XXX and National Authorities. Thank you for your input. Troubleshooting mobile +1234567890 or email firstnamelastname@institute.org	yes
										'vU6ydNRoxJTraMPZpJZfMA'

## Sheet: choices
list_name	name	label
lunch_ddmm1	1	Yes
lunch_ddmm1	0	No
lunch_ddmm1	9	Don't know/Don't remember
lunch_ddmm2	1	Yes
lunch_ddmm2	0	No
lunch_ddmm2	9	Don't know/Don't remember
lunch_ddmm3	1	Yes
lunch_ddmm4	0	No
lunch_ddmm5	9	Don't know/Don't remember
diarrhoea	1	Yes
diarrhoea	0	No
diarrhoea	9	Don't know/Don't remember
abdominalpain	1	Yes
abdominalpain	0	No
abdominalpain	9	Don't know/Don't remember
fever	1	Yes
fever	0	No
fever	9	Don't know/Don't remember
vomiting	1	Yes
vomiting	0	No
vomiting	9	Don't know/Don't remember
nausea	1	Yes
nausea	0	No
nausea	9	Don't know/Don't remember
headache	1	Yes
headache	0	No
headache	9	Don't know/Don't remember
gp	1	Yes
gp	0	No
gp	9	Don't know/Don't remember
sample	1	Yes
sample	0	No
sample	9	Don't know/Don't remember
hospital	1	Yes
hospital	0	No
hospital	9	Don't know/Don't remember
travel	1	Yes
travel	0	No
travel	9	Don't know/Don't remember
household	1	Yes
household	0	No
household	9	Don't know/Don't remember
food1	1	Yes
food1	0	No
food1	9	Don't know/Don't remember
food2	1	Yes
food2	0	No
food2	9	Don't know/Don't remember
food3	1	Yes
food3	0	No
food3	9	Don't know/Don't remember
food1_q	1	Tasted
food1_q	2	Normal amount
food1_q	3	A lot
food2_q	1	1-2 pieces
food2_q	3	3-5 pieces
food2_q	6	6 or more pieces
food3_q	1	Spoonful
food3_q	2	Half a plate
food3_q	3	Full plate
drink1	1	Yes
drink1	0	No
drink1	9	Don't know/Don't remember
drink1_q	0	Half a glass
drink1_q	1	1 glass
drink1_q	2	2 glasses
drink1_q	3	3 glasses
drink1_q	4	4+ glasses
dessert1	1	Yes
dessert1	0	No
dessert1	9	Don't know/Don't remember
dessert1_q	1	Little
dessert1_q	2	Normal portion
dessert1_q	3	A lot
symptomsstill	1	Yes
symptomsstill	0	No
symptomsstill	9	Don't know/Don't remember
absentschool	1	Yes
absentschool	0	No
absentschool	9	Don't know/Don't remember
status	status_student	Student
status	status_teacher	Teacher
status	status_kitchen	Kitchen staff
status	status_otherstaff	Other staff

## Sheet: settings
form_title	form_id	style
Outbreak	outbreaklj	pages
