# Supplementary material for: Assessment of Food and Waterborne Viral Outbreaks by Using Field Epidemiologic, Modern Laboratory and Statistical Methods—Lessons Learnt from Seven Major Norovirus Outbreaks in Finland
Source: Pathogens. 2021 Dec 14;10(12):1624. doi: 10.3390/pathogens10121624 (PMC8707936; doi:10.3390/pathogens10121624)
Supplement: Supplementary file 1 [file pathogens-10-01624-s001.zip › Supplementary file 4.txt]

# R code for reading the .csv data file to R console and calculating the RR's and confidence intervals
# this is just one way of doing this, there are many alternative ways. The instructions here are from Linux/Ubuntu 16.04, but are adaptable to e.g. Windows

# you may load R to your computer (it is free) from https://cran.r-project.org/. Accept all default settings.

# first identify what is your home folder

getwd()

# you might get the following result
[1] "/home/katri"

# you need to save your .csv file to that folder, or alternatively change you home folder by setwd()

setwd ("/home/katri/Documents/ob3/")

# you need to have saved your .csv file as comma separated as field delimiter, " as string delimiter and Unicode(UTF-8)
# Outbreak 3 is used as an example, with Case_cd as outcome variable and Strawberry as explanatory variable.
# read your .csv file with either one of the following commands:

ob3<-read.csv(file="ob3.csv", header = TRUE, fileEncoding="UTF-8")

# or

ob3b<-read.csv2(file="ob3.csv", header = TRUE, fileEncoding="UTF-8")

# you may check which one is correct by e.g. checking the variable names

names(ob3)
names(ob3b)

# the initial iteration value

start.p<-0.5

# the log regression model

model <- glm(Case_cd ~ Strawberry, data=ob3, family = binomial(link="log"), start = c(log(start.p), rep(0,1)), control = glm.control(trace=TRUE,maxit=100))

# the log regression model for dose response with three groups, reference (0) and two levels

model <- glm(Case_cd ~ as.factor(Waterice), data=ob5, family = binomial(link="log"), start = c(log(start.p), rep(0,2)), control = glm.control(trace=TRUE,maxit=100))

# summary of the model

summary(model)

# RR for Strawberry (point estimate)

exp(model$coeff)

# Wald's confidence intervals for the point estimate (same as Epi Info)

exp(confint.default(model))

# profile likelihood based confidence intervals for the point estimate

exp(confint(model))
